# Supplementary material for: Progress in morphology control from fullerene to nonfullerene acceptors for scalable high-performance organic photovoltaics
Source: Royal Society of Chemistry journal article supplement (doi:10.1039/d1ta06861j), 2021-01-01
Supplement: d1ta06861j1.pdf [file d1ta06861j1.pdf]

## Electronic Supplementary Information

# Progress in Morphology Control from Fullerene to Nonfullerene Acceptors for Scalable High-Performance Organic Photovoltaics

Seongwon Yoon,<sup>a,†</sup> Eul-Yong Shin,<sup>a,†</sup> Nam-Kwang Cho,<sup>a</sup> Sungmin Park,<sup>a</sup> Han Young Woo,<sup>b</sup> and Hae Jung Son<sup>\*a,c</sup>

<sup>a</sup> Advanced Photovoltaics Research Center, Korea Institute of Science and Technology, Seoul 02792, Republic of Korea.

<sup>b</sup> Department of Chemistry, Korea University, Seoul 02841, Republic of Korea.

<sup>c</sup> Graduate School of Energy and Environment (KU-KIST GREEN SCHOOL), Korea University, Seoul 02841, Republic of Korea.

<sup>†</sup> These authors contributed equally to this work.

\* Corresponding authors: Prof. H. J. Son ([hjson@kist.re.kr](mailto:hjson@kist.re.kr))

**Table S1.** Selected device performance of recently reported organic photovoltaics (OPVs) and OPV modules used in Figure 1. The (m) in 'Area' column indicates that the corresponding device is OPV module.

| Year                                 | Active layer materials                                                       | Area<br>[cm <sup>2</sup> ] | V <sub>oc</sub><br>[V] | J <sub>sc</sub><br>[mA/cm <sup>2</sup> ] | FF<br>[%] | PCE<br>[%] | Ref. |
|--------------------------------------|------------------------------------------------------------------------------|----------------------------|------------------------|------------------------------------------|-----------|------------|------|
| <i>Fullerene acceptor-based OPVs</i> |                                                                              |                            |                        |                                          |           |            |      |
| 2015                                 | pDPP5T-2S:PC <sub>71</sub> BM                                                | -                          | 0.54                   | 15.50                                    | 67.00     | 5.60       | 1    |
| 2015                                 | P390:PC <sub>71</sub> BM                                                     | -                          | 0.55                   | 17.50                                    | 65.00     | 6.10       | 1    |
| 2015                                 | pDPP5T-2:PC <sub>71</sub> BM                                                 | -                          | 0.54                   | 17.30                                    | 67.00     | 6.30       | 1    |
| 2015                                 | PIDT-PhanQ:PC <sub>71</sub> BM                                               | 0.0314                     | 0.87                   | 12.00                                    | 68.00     | 7.08       | 2    |
| 2015                                 | PV2000:PC <sub>61</sub> BM                                                   | 0.038                      | 0.78                   | 13.40                                    | 66.90     | 7.00       | 3    |
| 2015                                 | TBTIT-h:PC <sub>71</sub> BM                                                  | 0.045                      | 0.72                   | 17.70                                    | 71.00     | 9.10       | 4    |
| 2015                                 | PffBT-T3(1,2)-2:PC <sub>71</sub> BM                                          | 0.056                      | 0.82                   | 18.90                                    | 66.80     | 10.70      | 5    |
| 2015                                 | P3HT:MeSAF6                                                                  | 0.071                      | 0.63                   | 8.01                                     | 71.00     | 3.53       | 6    |
| 2015                                 | P3HT:PC <sub>61</sub> BM                                                     | 0.805                      | 0.56                   | 5.49                                     | 57.10     | 1.76       | 7    |
| 2015                                 | PBDT-BT:PC <sub>71</sub> BM                                                  | 0.1                        | 0.92                   | 15.40                                    | 66.00     | 9.40       | 8    |
| 2015                                 | PPDT2FBT:PC <sub>71</sub> BM                                                 | 0.13                       | 0.80                   | 15.40                                    | 67.00     | 8.28       | 9    |
| 2015                                 | PBDTT-F-TT:PC <sub>71</sub> BM                                               | 0.031                      | 0.81                   | 18.30                                    | 71.00     | 10.50      | 10   |
| 2015                                 | PBDTT-F-TT:PC <sub>71</sub> BM                                               | 1.0                        | 0.80                   | 15.80                                    | 57.00     | 7.21       | 10   |
| 2015                                 | PCDTBT:PC <sub>71</sub> BM                                                   | 1.65                       | 0.87                   | 9.50                                     | 45.00     | 3.70       | 11   |
| 2015                                 | PCDTBT:PC <sub>71</sub> BM                                                   | 4                          | 0.87                   | 9.60                                     | 50.00     | 4.90       | 11   |
| 2015                                 | POD2T-DTBT:PC <sub>71</sub> BM                                               | 108(m)                     | 6.24                   | 1.05                                     | 56.00     | 3.64       | 12   |
| 2016                                 | PffBT4T-2OD:PC <sub>71</sub> BM                                              | 0.04                       | 0.77                   | 18.40                                    | 70.00     | 9.90       | 13   |
| 2016                                 | PTB7-Th:PC <sub>71</sub> BM                                                  | 0.055                      | 0.79                   | 18.50                                    | 71.10     | 10.40      | 14   |
| 2016                                 | PffBT4T-C9C13:PC <sub>71</sub> BM                                            | 0.059                      | 0.78                   | 19.80                                    | 73.00     | 11.30      | 15   |
| 2016                                 | PCDTBT:FCN-2                                                                 | 0.08                       | 0.90                   | 8.66                                     | 71.20     | 5.55       | 16   |
| 2016                                 | PBTZT- <i>stat</i> -BDTT-8:PC <sub>61</sub> BM                               | 0.04                       | 0.78                   | 16.30                                    | 74.00     | 9.30       | 17   |
| 2016                                 | PBTZT- <i>stat</i> -BDTT-8:PC <sub>61</sub> BM                               | 1                          | 0.80                   | 14.30                                    | 68.00     | 7.50       | 17   |
| 2016                                 | PBTZT- <i>stat</i> -BDTT-8:PC <sub>61</sub> BM                               | 114.5(m)                   | 7.00                   | 119.70                                   | 62.00     | 4.50       | 17   |
| 2016                                 | PBTZT- <i>stat</i> -BDTT-8:PC <sub>61</sub> BM                               | 0.104                      | 0.77                   | 13.50                                    | 59.80     | 6.22       | 18   |
| 2016                                 | PBTZT- <i>stat</i> -BDTT-8:PC <sub>61</sub> BM                               | 35(m)                      | 10.50                  | 0.82                                     | 62.00     | 5.28       | 18   |
| 2016                                 | P3HT:PC <sub>61</sub> BM                                                     | 8(m)                       | 4.30                   | 9.43                                     | 40.00     | 2.04       | 19   |
| 2016                                 | PTB7-Th:PC <sub>71</sub> BM                                                  | 16.6(m)                    | 2.37                   | 4.87                                     | 58.00     | 7.40       | 20   |
| 2017                                 | <i>p</i> -DTS(FBTTh <sub>2</sub> ) <sub>2</sub> :PCPDTBT:PC <sub>61</sub> BM | -                          | 0.80                   | 14.50                                    | 67.50     | 7.80       | 21   |
| 2017                                 | PTB7-Th:PC <sub>71</sub> BM                                                  | -                          | 0.79                   | 18.50                                    | 69.80     | 10.15      | 22   |
| 2017                                 | TQxFBT:PC <sub>71</sub> BM                                                   | 0.04                       | 0.62                   | 11.02                                    | 61.00     | 4.18       | 23   |
| 2017                                 | LGC-D013:PC <sub>71</sub> BM                                                 | 0.0464                     | 0.87                   | 11.29                                    | 73.13     | 7.22       | 24   |
| 2017                                 | PTB7-Th:CN-PC <sub>71</sub> BM                                               | 0.1                        | 0.90                   | 13.50                                    | 68.00     | 8.20       | 25   |

| Year | Active layer materials                                                        | Area<br>[cm <sup>2</sup> ] | V <sub>oc</sub><br>[V] | J <sub>sc</sub><br>[mA/cm <sup>2</sup> ] | FF<br>[%] | PCE<br>[%] | Ref. |
|------|-------------------------------------------------------------------------------|----------------------------|------------------------|------------------------------------------|-----------|------------|------|
| 2017 | PTB7-Th:PyF5                                                                  | 0.104                      | 0.84                   | 13.80                                    | 56.00     | 6.40       | 26   |
| 2017 | PDTBTBz-2F <sub>anti</sub> :PC <sub>71</sub> BM                               | 0.13                       | 0.97                   | 14.00                                    | 72.00     | 9.80       | 27   |
| 2017 | SMPV1:PC <sub>61</sub> BM                                                     | 0.1                        | 0.95                   | 12.72                                    | 67.03     | 8.10       | 28   |
| 2017 | SMPV1:PC <sub>61</sub> BM                                                     | 1                          | 0.94                   | 10.17                                    | 64.85     | 6.20       | 28   |
| 2017 | SMPV1:PC <sub>61</sub> BM                                                     | 5.5                        | 0.93                   | 8.54                                     | 47.00     | 3.73       | 28   |
| 2017 | P3HT:PC <sub>61</sub> BM                                                      | 0.04                       | 0.62                   | 10.40                                    | 54.00     | 3.50       | 29   |
| 2017 | P3HT:PC <sub>61</sub> BM                                                      | 10.8(m)                    | 1.89                   | 2.50                                     | 57.00     | 2.70       | 29   |
| 2017 | PBDTTT-EFT:PC <sub>71</sub> BM                                                | 0.04                       | 0.84                   | 16.80                                    | 67.00     | 9.40       | 29   |
| 2017 | PBDTTT-EFT:PC <sub>71</sub> BM                                                | 10.8(m)                    | 2.51                   | 4.20                                     | 55.00     | 5.90       | 29   |
| 2017 | BTR:PC <sub>71</sub> BM                                                       | 0.1                        | 0.90                   | 10.40                                    | 69.60     | 6.56       | 30   |
| 2017 | BTR:PC <sub>71</sub> BM                                                       | 10(m)                      | 3.76                   | 1.84                                     | 65.97     | 4.80       | 30   |
| 2017 | PCDTBT:PC <sub>71</sub> BM                                                    | 5.6                        | 0.87                   | 10.70                                    | 39.60     | 3.69       | 31   |
| 2017 | PCDTBT:PC <sub>71</sub> BM                                                    | 33.5(m)                    | 4.55                   | 1.82                                     | 39.20     | 3.25       | 31   |
| 2017 | POD2T-DTBT:PC <sub>71</sub> BM                                                | 24(m)                      | 5.66                   | 1.20                                     | 58.00     | 3.93       | 32   |
| 2017 | PDTBT- <i>alt</i> -TT:PC <sub>71</sub> BM                                     | 24(m)                      | 6.10                   | 1.45                                     | 63.10     | 5.58       | 32   |
| 2017 | PTB7-Th; <i>p</i> -DTS(FBTTh <sub>2</sub> ) <sub>2</sub> :PC <sub>71</sub> BM | 1.25                       | 0.73                   | 18.38                                    | 61.88     | 8.28       | 33   |
| 2017 | PTB7-Th; <i>p</i> -DTS(FBTTh <sub>2</sub> ) <sub>2</sub> :PC <sub>71</sub> BM | 5                          | 0.70                   | 16.01                                    | 51.06     | 5.75       | 33   |
| 2017 | PTB7-Th; <i>p</i> -DTS(FBTTh <sub>2</sub> ) <sub>2</sub> :PC <sub>71</sub> BM | 10(m)                      | 1.43                   | 7.65                                     | 53.25     | 5.82       | 33   |
| 2017 | PTB7-Th; <i>p</i> -DTS(FBTTh <sub>2</sub> ) <sub>2</sub> :PC <sub>71</sub> BM | 20(m)                      | 2.71                   | 3.89                                     | 49.19     | 5.18       | 33   |
| 2018 | PCDTBT:Et <sub>2</sub> - <i>cis</i> -1-[70]PBC                                | -                          | 0.84                   | 9.24                                     | 59.00     | 4.60       | 34   |
| 2018 | PffBT4T-2OD:PC <sub>71</sub> BM                                               | 0.026                      | 0.76                   | 17.30                                    | 70.00     | 9.31       | 35   |
| 2018 | PffBT4T-2OD:PC <sub>71</sub> BM                                               | 0.041                      | 0.74                   | 13.89                                    | 58.85     | 6.11       | 36   |
| 2018 | PBTIBDT:PC <sub>71</sub> BM                                                   | 0.06                       | 0.96                   | 8.87                                     | 65.70     | 5.59       | 37   |
| 2018 | P3HT:PC <sub>61</sub> BM                                                      | 0.09                       | 0.66                   | 12.75                                    | 49.95     | 4.20       | 38   |
| 2018 | SM2:PC <sub>71</sub> BM                                                       | 0.1                        | 0.90                   | 10.50                                    | 67.00     | 6.50       | 39   |
| 2018 | BDT[2F]QdC:PC <sub>71</sub> BM                                                | 0.1                        | 0.94                   | 11.40                                    | 66.00     | 7.10       | 40   |
| 2018 | PDT2fBT-BT10:PC <sub>71</sub> BM                                              | 0.2                        | 0.74                   | 18.92                                    | 73.45     | 10.31      | 41   |
| 2018 | PDT2fBT-BT10:PC <sub>71</sub> BM                                              | 1                          | 0.75                   | 18.23                                    | 66.23     | 9.03       | 41   |
| 2018 | PTB7-Th:PC <sub>71</sub> BM                                                   | 16(m)                      | 3.04                   | 4.50                                     | 55.00     | 7.50       | 42   |
| 2019 | BQR:PC <sub>71</sub> BM                                                       | 0.04                       | 0.95                   | 12.80                                    | 62.00     | 7.30       | 43   |
| 2019 | 2F-DRCN5T:PC <sub>71</sub> BM                                                 | 0.1                        | 1.08                   | 11.90                                    | 63.60     | 8.13       | 44   |
| 2019 | PTB7-Th:FB-C60                                                                | 0.1                        | 0.83                   | 17.10                                    | 67.50     | 9.60       | 45   |
| 2019 | PV2000:PC <sub>71</sub> BM                                                    | 23.7(m)                    | 4.02                   | 2.87                                     | 65.30     | 7.56       | 46   |
| 2019 | PTB7-Th; <i>p</i> -DTS(FBTTh <sub>2</sub> ) <sub>2</sub> :PC <sub>71</sub> BM | 0.01                       | 0.70                   | 20.82                                    | 69.27     | 10.14      | 47   |
| 2019 | PTB7-Th; <i>p</i> -DTS(FBTTh <sub>2</sub> ) <sub>2</sub> :PC <sub>71</sub> BM | 1                          | 0.73                   | 17.06                                    | 57.38     | 7.11       | 47   |
| 2019 | PffBT4T-2OD:PC <sub>71</sub> BM                                               | 0.04                       | 0.76                   | 15.80                                    | 71.00     | 8.50       | 48   |

| Year                                    | Active layer materials                  | Area<br>[cm <sup>2</sup> ] | V <sub>oc</sub><br>[V] | J <sub>sc</sub><br>[mA/cm <sup>2</sup> ] | FF<br>[%] | PCE<br>[%] | Ref. |
|-----------------------------------------|-----------------------------------------|----------------------------|------------------------|------------------------------------------|-----------|------------|------|
| 2019                                    | PffBT4T-2OD:PC <sub>71</sub> BM         | 1                          | 0.75                   | 15.40                                    | 69.00     | 8.00       | 48   |
| 2019                                    | LGC-D073:PC <sub>71</sub> BM            | 0.1                        | 0.84                   | 11.30                                    | 62.00     | 5.82       | 49   |
| 2019                                    | LGC-D073:PC <sub>71</sub> BM            | 24(m)                      | 3.30                   | 3.10                                     | 54.00     | 5.50       | 49   |
| 2019                                    | PF2:PC <sub>71</sub> BM                 | 0.12                       | 0.75                   | 19.50                                    | 72.00     | 10.50      | 50   |
| 2019                                    | PF2:PC <sub>71</sub> BM                 | 66(m)                      | 11.70                  | 0.89                                     | 59.00     | 6.10       | 50   |
| 2020                                    | BTID-0F:PC <sub>71</sub> BM             | 0.04                       | 0.94                   | 13.73                                    | 65.35     | 8.47       | 51   |
| 2020                                    | P3HT:2b                                 | 0.05                       | 0.37                   | 9.40                                     | 67.00     | 4.60       | 52   |
| 2020                                    | PBDB-T:PC <sub>71</sub> BM              | 1.35                       | 0.83                   | 13.02                                    | 64.06     | 6.91       | 53   |
| 2020                                    | BDT-Th10:PC <sub>71</sub> BM            | 0.5                        | 0.77                   | 17.32                                    | 65.66     | 8.71       | 54   |
| 2020                                    | BDT-Th10:PC <sub>71</sub> BM            | 58.5(m)                    | 7.53                   | 1.55                                     | 66.34     | 7.74       | 54   |
| <i>Nonfullerene acceptor-based OPVs</i> |                                         |                            |                        |                                          |           |            |      |
| 2015                                    | PiI-tT-PS5:P(TP)                        | 0.04                       | 1.01                   | 7.04                                     | 46.00     | 3.27       | 55   |
| 2015                                    | P3HT:IDT-2BR                            | 0.04                       | 0.84                   | 8.91                                     | 68.10     | 5.12       | 56   |
| 2015                                    | PTB7-Th:ITIC                            | 0.04                       | 0.81                   | 14.21                                    | 59.10     | 6.80       | 57   |
| 2015                                    | P3HT:F(DPP) <sub>2</sub> B <sub>2</sub> | 0.054                      | 0.78                   | 2.20                                     | 35.00     | 0.60       | 58   |
| 2015                                    | PBDTTT-C-T:DC-IDT2T                     | 1.1                        | 0.80                   | 3.09                                     | 40.11     | 1.02       | 59   |
| 2016                                    | P3HT:o-IDTBR                            | 0.0045                     | 0.73                   | 14.10                                    | 62.00     | 6.40       | 60   |
| 2016                                    | PTB7-Th:ATT-1                           | 0.03                       | 0.87                   | 16.48                                    | 70.00     | 10.07      | 61   |
| 2016                                    | PTB7-Th:B-DIPDI                         | 0.0314                     | 0.78                   | 13.02                                    | 62.00     | 6.29       | 62   |
| 2016                                    | PBDT-TS1:PPDIODT                        | 0.069                      | 0.74                   | 12.80                                    | 55.00     | 5.21       | 63   |
| 2016                                    | PTB7-Th:IEIC                            | 0.66                       | 0.94                   | 6.86                                     | 35.17     | 2.26       | 64   |
| 2016                                    | PTB7-Th:IEIC                            | 0.98                       | 0.90                   | 5.39                                     | 36.71     | 1.79       | 64   |
| 2016                                    | PBDB-T:ITIC                             | 0.13                       | 0.90                   | 16.81                                    | 74.20     | 11.21      | 65   |
| 2016                                    | PBDB-T:ITIC                             | 1                          | 0.89                   | 16.12                                    | 75.40     | 10.78      | 65   |
| 2017                                    | PTB7-Th:FRd <sub>2</sub>                | -                          | 0.83                   | 15.70                                    | 72.30     | 9.40       | 66   |
| 2017                                    | PTB7-Th:βTPB6-c                         | 0.0314                     | 0.92                   | 14.70                                    | 56.00     | 7.56       | 67   |
| 2017                                    | PffBT4T-2OD:EH-IDTBR                    | 0.045                      | 1.08                   | 14.65                                    | 60.00     | 9.50       | 68   |
| 2017                                    | J71:BDT-IC                              | 0.047                      | 0.92                   | 17.3                                     | 65.5      | 10.5       | 69   |
| 2017                                    | PffBT4T-B:ITIC-Th                       | 0.059                      | 0.97                   | 15.59                                    | 61.80     | 9.40       | 70   |
| 2017                                    | PBDT-TS1:PPDIODT                        | 0.069                      | 0.74                   | 14.50                                    | 52.20     | 5.60       | 71   |
| 2017                                    | PTB7-Th:ITIC                            | 0.1                        | 0.80                   | 14.97                                    | 65.00     | 8.11       | 72   |
| 2017                                    | PTB7-Th:PPDIE                           | 10                         | 0.64                   | 15.50                                    | 50.00     | 5.00       | 73   |
| 2018                                    | PTB7-Th:IDTT-T                          | 0.03                       | 1.02                   | 18.00                                    | 65.00     | 11.80      | 74   |
| 2018                                    | PTB7-Th:NFDTSB                          | 0.038                      | 0.75                   | 20.14                                    | 63.30     | 9.60       | 75   |
| 2018                                    | PB3T:I-TM                               | 0.04                       | 0.98                   | 17.30                                    | 70.00     | 11.90      | 76   |
| 2018                                    | PB3T:I-TM                               | 1                          | 0.98                   | 15.60                                    | 66.00     | 10.10      | 76   |

| Year | Active layer materials | Area<br>[cm <sup>2</sup> ] | V <sub>oc</sub><br>[V] | J <sub>sc</sub><br>[mA/cm <sup>2</sup> ] | FF<br>[%] | PCE<br>[%] | Ref. |
|------|------------------------|----------------------------|------------------------|------------------------------------------|-----------|------------|------|
| 2018 | PTB7-Th:ITIC           | 0.14                       | 0.83                   | 16.00                                    | 71.00     | 9.54       | 77   |
| 2018 | PTB7-Th:ITIC           | 2.03                       | 0.81                   | 14.70                                    | 63.00     | 7.60       | 77   |
| 2018 | FTAZ:IT-M              | 0.56                       | 0.93                   | 16.40                                    | 64.60     | 9.80       | 78   |
| 2018 | PBTA-TF:IT-M           | 1                          | 0.95                   | 17.13                                    | 65.00     | 10.60      | 79   |
| 2018 | PTB7-Th:PNDI-T10       | 2.03                       | 0.82                   | 12.94                                    | 63.00     | 6.65       | 80   |
| 2018 | PBTIBDTT:ITIC-F        | 3.48(m)                    | 4.53                   | 2.92                                     | 65.10     | 8.60       | 81   |
| 2018 | PBDB-T:ITIC            | 18(m)                      | 11.60                  | 0.99                                     | 55.00     | 6.30       | 82   |
| 2018 | P3HT:IDTBR             | 59.52(m)                   | 8.39                   | 0.81                                     | 64.90     | 4.40       | 83   |
| 2018 | P3HT:IDTBR             | 59.52(m)                   | 8.53                   | 0.91                                     | 64.90     | 5.00       | 83   |
| 2019 | PBDB-TF:BTP-4F-12      | 0.037                      | 0.86                   | 25.30                                    | 76.00     | 16.40      | 84   |
| 2019 | PBDB-TF-T1:BTP-4F-12   | 1.07                       | 0.84                   | 24.40                                    | 72.00     | 14.80      | 84   |
| 2019 | PTB7-Th:CO/8DFIC       | 0.04                       | 0.69                   | 27.30                                    | 71.00     | 13.80      | 85   |
| 2019 | J71/ITC6-IC (LbL)      | 0.04                       | 0.96                   | 17.61                                    | 67.54     | 11.42      | 86   |
| 2019 | J71/ITC6-IC (LbL)      | 0.2                        | 0.97                   | 17.30                                    | 66.19     | 11.13      | 86   |
| 2019 | J71/ITC6-IC (LbL)      | 1                          | 0.97                   | 16.16                                    | 65.79     | 10.35      | 86   |
| 2019 | PTQ10/IDIC (LbL)       | 0.04                       | 0.95                   | 17.14                                    | 69.13     | 11.28      | 86   |
| 2019 | PTQ10/IDIC (LbL)       | 0.2                        | 0.96                   | 16.68                                    | 69.32     | 11.13      | 86   |
| 2019 | PTQ10/IDIC (LbL)       | 1                          | 0.97                   | 15.89                                    | 67.90     | 10.42      | 86   |
| 2019 | PM6:IT-4F              | 0.04                       | 0.85                   | 19.70                                    | 67.00     | 11.20      | 48   |
| 2019 | PM6:IT-4F              | 1                          | 0.84                   | 19.50                                    | 65.00     | 10.60      | 48   |
| 2019 | PM6/IT-4F (LbL)        | 0.04                       | 0.84                   | 20.70                                    | 71.00     | 12.30      | 48   |
| 2019 | PM6/IT-4F (LbL)        | 1                          | 0.84                   | 20.00                                    | 68.00     | 11.40      | 48   |
| 2019 | PM6:Y6                 | 0.05                       | 0.82                   | 25.20                                    | 76.10     | 15.70      | 87   |
| 2019 | FTAZ:IT-M              | 0.069                      | 0.95                   | 18.19                                    | 70.41     | 12.22      | 88   |
| 2019 | PBDB-TF:BTP-4F         | 0.09                       | 0.83                   | 24.90                                    | 75.30     | 15.60      | 89   |
| 2019 | PBDB-TF:BTP-4CI        | 0.09                       | 0.87                   | 25.40                                    | 75.00     | 16.50      | 89   |
| 2019 | PBDB-TF:BTP-4CI        | 1                          | 0.86                   | 25.00                                    | 71.30     | 15.30      | 89   |
| 2019 | PTB7-Th:EH-ID          | 0.1                        | 1.03                   | 16.51                                    | 62.50     | 10.63      | 90   |
| 2019 | PTB7-T:BAF-2HDT        | 0.1                        | 0.90                   | 15.40                                    | 71.50     | 9.90       | 91   |
| 2019 | PBDB-T:ITIC            | 0.1                        | 0.88                   | 16.97                                    | 62.70     | 9.59       | 92   |
| 2019 | PM6:IT-4F              | 0.12                       | 0.86                   | 20.80                                    | 72.00     | 12.88      | 93   |
| 2019 | PBDB-T-SF:IT-4F        | 0.1                        | 0.88                   | 20.55                                    | 71.66     | 12.90      | 94   |
| 2019 | PBDB-T-SF:IT-4F        | 0.2                        | 0.87                   | 20.39                                    | 69.71     | 12.32      | 94   |
| 2019 | PBDB-T-SF:IT-4F        | 0.4(m)                     | 1.74                   | 10.02                                    | 69.45     | 12.12      | 94   |
| 2019 | PBDB-T-SF:IT-4F        | 1                          | 0.88                   | 19.76                                    | 64.70     | 11.19      | 94   |
| 2019 | PBDB-T-SF:IT-4F        | 2(m)                       | 1.73                   | 9.50                                     | 54.78     | 9.01       | 94   |

| Year | Active layer materials           | Area<br>[cm <sup>2</sup> ] | V <sub>oc</sub><br>[V] | J <sub>sc</sub><br>[mA/cm <sup>2</sup> ] | FF<br>[%] | PCE<br>[%] | Ref. |
|------|----------------------------------|----------------------------|------------------------|------------------------------------------|-----------|------------|------|
| 2019 | PM6:IT-4F                        | 1                          | 0.86                   | 21.10                                    | 72.00     | 13.20      | 95   |
| 2019 | PM6:IT-4F                        | 12.6(m)                    | 2.56                   | 6.23                                     | 64.02     | 10.21      | 96   |
| 2019 | SMD2:ITIC                        | 80(m)                      | 8.80                   | 1.12                                     | 53.10     | 5.25       | 97   |
| 2019 | PBDB-T:PC <sub>71</sub> BM:ITIC  | 216(m)                     | 14.20                  | 0.91                                     | 59.00     | 7.69       | 98   |
| 2020 | PM6:FO-2F                        | -                          | 0.88                   | 22.26                                    | 77.00     | 15.05      | 99   |
| 2020 | PT2:Y6                           | 0.04                       | 0.83                   | 26.70                                    | 74.40     | 16.50      | 100  |
| 2020 | D18:Y6Se                         | 0.04                       | 0.84                   | 27.98                                    | 75.30     | 17.70      | 101  |
| 2020 | D18:Y6                           | 0.04                       | 0.86                   | 27.70                                    | 76.60     | 18.22      | 102  |
| 2020 | TPD-3F:IT-4F                     | 0.04                       | 0.90                   | 20.60                                    | 72.40     | 13.40      | 103  |
| 2020 | TPD-3F:IT-4F                     | 20.4(m)                    | 4.52                   | 3.50                                     | 64.00     | 10.13      | 103  |
| 2020 | NF3000-P:NF3000-N                | 0.04                       | 0.94                   | 19.30                                    | 67.60     | 12.30      | 104  |
| 2020 | NF3000-P:NF3000-N                | 10.8(m)                    | 2.76                   | 5.29                                     | 67.00     | 9.80       | 104  |
| 2020 | NF3000-P:NF3000-N                | 216(m)                     | 13.50                  | 1.25                                     | 56.10     | 9.50       | 104  |
| 2020 | PM6:Y6                           | 0.04                       | 0.84                   | 25.22                                    | 72.49     | 15.37      | 105  |
| 2020 | PM6:Y6                           | 1                          | 0.84                   | 25.52                                    | 65.74     | 14.01      | 105  |
| 2020 | PM6:Y6                           | 3.3(m)                     | 2.51                   | 8.61                                     | 55.78     | 12.06      | 105  |
| 2020 | PM6:Y6                           | 11.52(m)                   | 3.21                   | 6.25                                     | 50.12     | 10.15      | 105  |
| 2020 | PM6/Y6 (LbL)                     | 0.04                       | 0.83                   | 25.90                                    | 75.68     | 16.35      | 105  |
| 2020 | PM6/Y6 (LbL)                     | 1                          | 0.83                   | 25.64                                    | 71.42     | 15.23      | 105  |
| 2020 | PM6/Y6 (LbL)                     | 3.3(m)                     | 2.49                   | 8.72                                     | 63.92     | 13.88      | 105  |
| 2020 | PM6/Y6 (LbL)                     | 11.52(m)                   | 3.20                   | 6.41                                     | 57.85     | 11.86      | 105  |
| 2020 | PBDB-TF:BTP-4Cl-12               | 0.06                       | 0.86                   | 15.60                                    | 77.60     | 17.00      | 106  |
| 2020 | PM6:BTP-eC9                      | 0.062                      | 0.84                   | 26.20                                    | 81.10     | 17.80      | 107  |
| 2020 | PM6:BTP-eC7                      | 1                          | 0.81                   | 20.30                                    | 53.30     | 8.75       | 107  |
| 2020 | PM6:BTP-eC9                      | 1                          | 0.83                   | 25.70                                    | 75.90     | 16.20      | 107  |
| 2020 | PM6:BTP-eC11                     | 1                          | 0.84                   | 25.30                                    | 72.20     | 15.40      | 107  |
| 2020 | TPD-3F-51K:IT4F                  | 5.95                       | 0.90                   | 20.90                                    | 73.50     | 13.80      | 103  |
| 2020 | PM6:DTY6                         | 18(m)                      | 5.11                   | 3.89                                     | 72.50     | 14.40      | 108  |
| 2020 | PTB7-Th:EH-IDTBR:T2-OEHRH        | 55.5(m)                    | 11.47                  | 1.29                                     | 63.00     | 9.32       | 109  |
| 2020 | PBDB-T:ITIC                      | 58.5(m)                    | 8.80                   | 1.71                                     | 60.00     | 9.03       | 53   |
| 2021 | PM6:Y6                           | -                          | 0.85                   | 25.75                                    | 74.07     | 16.26      | 110  |
| 2021 | PM6:L8-BO                        | 0.03152                    | 0.87                   | 25.72                                    | 81.50     | 18.32      | 111  |
| 2021 | PM6:Y6:Y6-BO:PC <sub>71</sub> BM | 0.032                      | 0.85                   | 26.67                                    | 78.49     | 17.84      | 112  |
| 2021 | PM6:Y6                           | 0.04                       | 0.84                   | 26.34                                    | 70.47     | 15.63      | 113  |
| 2021 | PM6:Y6                           | 0.56                       | 0.83                   | 25.99                                    | 63.17     | 13.64      | 113  |
| 2021 | PBDB-T:ITIC                      | 0.0422                     | 0.84                   | 16.87                                    | 57.80     | 8.19       | 114  |

| <b>Year</b> | <b>Active layer materials</b> | <b>Area<br/>[cm<sup>2</sup>]</b> | <b>V<sub>OC</sub><br/>[V]</b> | <b>J<sub>sc</sub><br/>[mA/cm<sup>2</sup>]</b> | <b>FF<br/>[%]</b> | <b>PCE<br/>[%]</b> | <b>Ref.</b> |
|-------------|-------------------------------|----------------------------------|-------------------------------|-----------------------------------------------|-------------------|--------------------|-------------|
| 2021        | PM6-Ir:Y6                     | 0.05                             | 0.84                          | 26.26                                         | 75.51             | 16.79              | 115         |
| 2021        | PM6-Ir/Y6 (LbL)               | 0.05                             | 0.85                          | 26.69                                         | 76.64             | 17.21              | 115         |
| 2021        | PBDB-T:Y6                     | 0.05                             | 0.72                          | 25.50                                         | 59.47             | 10.68              | 115         |
| 2021        | PBDB-T/Y6 (LbL)               | 0.05                             | 0.72                          | 25.94                                         | 61.68             | 11.44              | 115         |
| 2021        | PBDB-T:PYT                    | 0.05                             | 0.89                          | 22.46                                         | 70.58             | 14.10              | 115         |
| 2021        | PBDB-T/PYT (LbL)              | 0.05                             | 0.89                          | 22.95                                         | 73.88             | 15.10              | 115         |
| 2021        | PBDB-T-2F:BT-BO-L4F           | 0.06                             | 0.83                          | 27.80                                         | 69.50             | 16.60              | 116         |
| 2021        | PM6:Y6                        | 0.08                             | 0.83                          | 24.95                                         | 74.55             | 15.51              | 117         |
| 2021        | PM6:Y6                        | 1                                | 0.84                          | 24.48                                         | 67.87             | 13.87              | 117         |
| 2021        | PBDB-T:ITIC-M                 | 0.125                            | 0.92                          | 19.16                                         | 69.00             | 12.06              | 118         |
| 2021        | D18:Y6                        | 0.173                            | 0.87                          | 25.24                                         | 73.60             | 16.10              | 119         |

## References

1. J. G. Tait, T. Merckx, W. Li, C. Wong, R. Gehlhaar, D. Cheyns, M. Turbiez and P. Heremans, *Adv. Funct. Mater.*, 2015, **25**, 3393-3398.
2. J. H. Kim, J. W. Jung, S. T. Williams, F. Liu, T. P. Russell and A. K. Y. Jen, *Nanoscale*, 2015, **7**, 10936-10939.
3. T. M. Eggenhuisen, Y. Galagan, A. F. K. V. Biezemans, T. M. W. L. Slaats, W. P. Voorthuizen, S. Kommeren, S. Shanmugam, J. P. Teunissen, A. Hadipour, W. J. H. Verhees, S. C. Veenstra, M. J. J. Coenen, J. Gilot, R. Andriessen and W. A. Groen, *J. Mater. Chem. A*, 2015, **3**, 7255-7262.
4. W. Yue, R. S. Ashraf, C. B. Nielsen, E. Collado-Fregoso, M. R. Niazi, S. A. Yousaf, M. Kirkus, H.-Y. Chen, A. Amassian, J. R. Durrant and I. McCulloch, *Adv. Mater.*, 2015, **27**, 4702-4707.
5. H. Hu, K. Jiang, G. Yang, J. Liu, Z. Li, H. Lin, Y. Liu, J. Zhao, J. Zhang, F. Huang, Y. Qu, W. Ma and H. Yan, *J. Am. Chem. Soc.*, 2015, **137**, 14149-14157.
6. T. Mikié, A. Saeki, Y. Yamazaki, N. Ikuma, K. Kokubo and S. Seki, *ACS Appl. Mater. Interfaces*, 2015, **7**, 8915-8922.
7. C. A. Lamont, T. M. Eggenhuisen, M. J. J. Coenen, T. W. L. Slaats, R. Andriessen and P. Groen, *Org. Electron.*, 2015, **17**, 107-114.
8. J. Subbiah, B. Purushothaman, M. Chen, T. Qin, M. Gao, D. Vak, F. H. Scholes, X. Chen, S. E. Watkins, G. J. Wilson, A. B. Holmes, W. W. H. Wong and D. J. Jones, *Adv. Mater.*, 2015, **27**, 702-705.
9. M. A. Uddin, T. H. Lee, S. Xu, S. Y. Park, T. Kim, S. Song, T. L. Nguyen, S.-j. Ko, S. Hwang, J. Y. Kim and H. Y. Woo, *Chem. Mater.*, 2015, **27**, 5997-6007.
10. J. Huang, C.-Z. Li, C.-C. Chueh, S.-Q. Liu, J.-S. Yu and A. K.-Y. Jen, *Adv. Energy Mater.*, 2015, **5**, 1500406.
11. N. W. Scarratt, J. Griffin, T. Wang, Y. Zhang, H. Yi, A. Iraqi and D. G. Lidzey, *APL Mater.*, 2015, **3**, 126108.
12. P.-T. Tsai, K.-C. Yu, C.-J. Chang, S.-F. Horng and H.-F. Meng, *Org. Electron.*, 2015, **22**, 166-172.
13. H. W. Ro, J. M. Downing, S. Engmann, A. A. Herzing, D. M. DeLongchamp, L. J. Richter, S. Mukherjee, H. Ade, M. Abdelsamie, L. K. Jagadamma, A. Amassian, Y. Liu and H. Yan, *Energy Environ. Sci.*, 2016, **9**, 2835-2846.
14. S. Nam, J. Seo, H. Han, H. Kim, S. G. Hahm, M. Ree, Y.-S. Gal, T. D. Anthopoulos, D. D. C. Bradley and Y. Kim, *Adv. Mater. Interfaces*, 2016, **3**, 1600415.
15. J. Zhao, Y. Li, G. Yang, K. Jiang, H. Lin, H. Ade, W. Ma and H. Yan, *Nat. Energy*, 2016, **1**, 15027.
16. S. Zhang, Z. Zhang, J. Liu and L. Wang, *Adv. Funct. Mater.*, 2016, **26**, 6107-6113.
17. S. Berny, N. Blouin, A. Distler, H.-J. Egelhaaf, M. Krompiec, A. Lohr, O. R. Lozman, G. E. Morse, L. Nanson, A. Pron, T. Sauermann, N. Seidler, S. Tierney, P. Tiwana, M. Wagner and H. Wilson, *Adv. Sci.*, 2016, **3**, 1500342.
18. L. Lucera, F. Machui, P. Kubis, H. D. Schmidt, J. Adams, S. Strohm, T. Ahmad, K. Forberich, H. J. Egelhaaf and C. J. Brabec, *Energy Environ. Sci.*, 2016, **9**, 89-94.
19. C. Kapnopoulos, E. D. Mekeridis, L. Tzounis, C. Polyzoidis, S. Tsimikli, C. Gravalidis, A. Zachariadis, A. Laskarakis and S. Logothetidis, *Mater. Today*



- Proc.*, 2016, **3**, 746-757.
20. S. Hong, H. Kang, G. Kim, S. Lee, S. Kim, J.-H. Lee, J. Lee, M. Yi, J. Kim, H. Back, J.-R. Kim and K. Lee, *Nat. Commun.*, 2016, **7**, 10279.
  21. X. Wu, S. Lan, G. Zhang, Q. Chen, H. Chen and T. Guo, *Adv. Funct. Mater.*, 2017, **27**, 1703268.
  22. Y. Wang, H. Zhu, Z. Shi, F. Wang, B. Zhang, S. Dai and Z. a. Tan, *J. Mater. Chem. A*, 2017, **5**, 2319-2327.
  23. S. Choi, G. E. Park, D. H. Lee, M. Godumala, M. J. Cho and D. H. Choi, *J. Polym. Sci., Part A: Polym. Chem.*, 2017, **55**, 1209-1218.
  24. S.-M. Bang, S. Kang, Y.-S. Lee, B. Lim, H. Heo, J. Lee, Y. Lee and S.-I. Na, *RSC Adv.*, 2017, **7**, 1975-1980.
  25. P. Nagarjuna, A. Bagui, V. Gupta and S. P. Singh, *Org. Electron.*, 2017, **43**, 262-267.
  26. C. Zhang, A. Mumyatov, S. Langner, J. D. Perea, T. Kassar, J. Min, L. Ke, H. Chen, K. L. Gerasimov, D. V. Anokhin, D. A. Ivanov, T. Ameri, A. Osvet, D. K. Susarova, T. Unruh, N. Li, P. Troshin and C. J. Brabec, *Adv. Energy Mater.*, 2017, **7**, 1601204.
  27. S.-J. Ko, Q. V. Hoang, C. E. Song, M. A. Uddin, E. Lim, S. Y. Park, B. H. Lee, S. Song, S.-J. Moon, S. Hwang, P.-O. Morin, M. Leclerc, G. M. Su, M. L. Chabinye, H. Y. Woo, W. S. Shin and J. Y. Kim, *Energy Environ. Sci.*, 2017, **10**, 1443-1455.
  28. M. E. Farahat, P. Perumal, W. Budiawan, Y.-F. Chen, C.-H. Lee and C.-W. Chu, *J. Mater. Chem. A*, 2017, **5**, 571-582.
  29. Y. Q. Wong, H.-F. Meng, H. Y. Wong, C. S. Tan, C.-Y. Wu, P.-T. Tsai, C.-Y. Chang, S.-F. Horng and H.-W. Zan, *Org. Electron.*, 2017, **43**, 196-206.
  30. Y.-J. Heo, Y.-S. Jung, K. Hwang, J.-E. Kim, J.-S. Yeo, S. Lee, Y.-J. Jeon, D. Lee and D.-Y. Kim, *ACS Appl. Mater. Interfaces*, 2017, **9**, 39519-39525.
  31. D. I. Kutsarov, E. New, F. Bausi, A. Zoladek-Lemanczyk, F. A. Castro and S. R. P. Silva, *Sol. Energy Mater. Sol. Cells*, 2017, **161**, 388-396.
  32. S.-L. Lim, K.-H. Ong, J. Li, L. Yang, Y.-F. Chang, H.-F. Meng, X. Wang and Z.-K. Chen, *Org. Electron.*, 2017, **43**, 55-63.
  33. J. Zhang, Y. Zhao, J. Fang, L. Yuan, B. Xia, G. Wang, Z. Wang, Y. Zhang, W. Ma, W. Yan, W. Su and Z. Wei, *Small*, 2017, **13**, 1700388.
  34. T. Umeyama, S. Takahara, S. Shibata, K. Igarashi, T. Higashino, K. Mishima, K. Yamashita and H. Imahori, *RSC Adv.*, 2018, **8**, 18316-18326.
  35. Y. Zhang, A. J. Parnell, O. Blaszczyk, A. J. Musser, I. D. W. Samuel, D. G. Lidzey and G. Bernardo, *Phys. Chem. Chem. Phys.*, 2018, **20**, 19023-19029.
  36. Z. Bi, H. B. Naveed, Y. Mao, H. Yan and W. Ma, *Macromolecules*, 2018, **51**, 6682-6691.
  37. S. J. Lou, N. Zhou, X. Guo, R. P. H. Chang, T. J. Marks and L. X. Chen, *J. Mater. Chem. A*, 2018, **6**, 23805-23818.
  38. X.-Y. Zhao, Z. Tao, W. Yang, K. Xu, L. Wang, Y. Jiang, Q. Zhang, Z. Gao, B. Mi, M. Hong and W. Deng, *Sol. Energy Mater. Sol. Cells*, 2018, **183**, 137-145.
  39. O. Alqahtani, M. Babics, J. Gorenflot, V. Savikhin, T. Ferron, A. H. Balawi, A. Paulke, Z. Kan, M. Pope, A. J. Clulow, J. Wolf, P. L. Burn, I. R. Gentle, D. Neher, M. F. Toney, F. Laquai, P. M. Beaujuge and B. A. Collins, *Adv. Energy Mater.*, 2018, **8**, 1702941.
  40. M. Babics, R.-Z. Liang, K. Wang, F. Cruciani, Z. Kan, M. Wohlfahrt, M.-C. Tang, F. Laquai and P. M. Beaujuge, *Chem. Mater.*, 2018, **30**, 789-798.

41. I. Shin, H. j. Ahn, J. H. Yun, J. W. Jo, S. Park, S.-y. Joe, J. Bang and H. J. Son, *Adv. Energy Mater.*, 2018, **8**, 1701405.
42. K. Zhang, Z. Chen, A. Armin, S. Dong, R. Xia, H.-L. Yip, S. Shoaee, F. Huang and Y. Cao, *Sol. RRL*, 2018, **2**, 1700169.
43. A. J. Bourque, S. Engmann, A. Fuster, C. R. Snyder, L. J. Richter, P. B. Geraghty and D. J. Jones, *J. Mater. Chem. A*, 2019, **7**, 16458-16471.
44. M. Babics, T. Duan, A. H. Balawi, R.-Z. Liang, F. Cruciani, I.-D. Carja, D. Gottlieb, I. McCulloch, K. Vandewal, F. Laquai and P. M. Beaujuge, *ACS Appl. Energy Mater.*, 2019, **2**, 2717-2722.
45. P. Nagarjuna, A. Bagui, R. S. Rao, V. Gupta and S. P. Singh, *ACS Appl. Energy Mater.*, 2019, **2**, 1019-1025.
46. Y.-M. Chang, C.-Y. Liao, C.-C. Lee, S.-Y. Lin, N.-W. Teng and P. Huei-Shuan Tan, *Sol. Energy Mater. Sol. Cells*, 2019, **202**, 110064.
47. Y. Zhao, G. Wang, Y. Wang, T. Xiao, M. A. Adil, G. Lu, J. Zhang and Z. Wei, *Sol. RRL*, 2019, **3**, 1800333.
48. S. Dong, K. Zhang, B. Xie, J. Xiao, H.-L. Yip, H. Yan, F. Huang and Y. Cao, *Adv. Energy Mater.*, 2019, **9**, 1802832.
49. Y.-J. Heo, B. Lim, Y.-S. Jung, K. Hwang, J.-E. Kim, D. Lee, D.-H. Lim, J. M. Park and D.-Y. Kim, *ACS Appl. Energy Mater.*, 2019, **2**, 8885-8893.
50. O. A. Ibraikulov, J. Wang, N. Kamatham, B. Heinrich, S. Méry, M. Kohlstädt, U. Würfel, S. Ferry, N. Leclerc, T. Heiser and P. Lévêque, *Sol. RRL*, 2019, **3**, 1900273.
51. Y. Zhang, D. Deng, Q. Wu, Y. Mi, C. Yang, X. Zhang, Y. Yang, W. Zou, J. Zhang, L. Zhu, H. Zhou, X. Liu and Z. Wei, *Sol. RRL*, 2020, **4**, 1900580.
52. P.-Y. Tseng, H.-C. Hsiao, C.-M. Hsieh, A.-J. Wu and S.-C. Chuang, *J. Chin. Chem. Soc.*, 2020, **67**, 430-436.
53. S. H. Park, S. Park, S. Lee, J. Kim, H. Ahn, B. J. Kim, B. Chae and H. J. Son, *Nano Energy*, 2020, **77**, 105147.
54. S. H. Park, S. Park, D. Kurniawan, J. G. Son, J. H. Noh, H. Ahn and H. J. Son, *Chem. Mater.*, 2020, **32**, 3469-3479.
55. Y. Diao, Y. Zhou, T. Kurosawa, L. Shaw, C. Wang, S. Park, Y. Guo, J. A. Reinspach, K. Gu, X. Gu, B. C. K. Tee, C. Pang, H. Yan, D. Zhao, M. F. Toney, S. C. B. Mannsfeld and Z. Bao, *Nat. Commun.*, 2015, **6**, 7955.
56. Y. Wu, H. Bai, Z. Wang, P. Cheng, S. Zhu, Y. Wang, W. Ma and X. Zhan, *Energy Environ. Sci.*, 2015, **8**, 3215-3221.
57. Y. Lin, J. Wang, Z.-G. Zhang, H. Bai, Y. Li, D. Zhu and X. Zhan, *Adv. Mater.*, 2015, **27**, 1170-1174.
58. W. Liu, H. Shi, T. R. Andersen, N. K. Zawacka, P. Cheng, E. Bundgaard, M. Shi, X. Zhan, F. C. Krebs and H. Chen, *RSC Adv.*, 2015, **5**, 36001-36006.
59. P. Cheng, H. Bai, N. K. Zawacka, T. R. Andersen, W. Liu, E. Bundgaard, M. Jørgensen, H. Chen, F. C. Krebs and X. Zhan, *Adv. Sci.*, 2015, **2**, 1500096.
60. S. Holliday, R. S. Ashraf, A. Wadsworth, D. Baran, S. A. Yousaf, C. B. Nielsen, C.-H. Tan, S. D. Dimitrov, Z. Shang, N. Gasparini, M. Alamoudi, F. Laquai, C. J. Brabec, A. Salleo, J. R. Durrant and I. McCulloch, *Nat. Commun.*, 2016, **7**, 11585.
61. F. Liu, Z. Zhou, C. Zhang, T. Vergote, H. Fan, F. Liu and X. Zhu, *J. Am. Chem. Soc.*, 2016, **138**, 15523-15526.
62. J. Yu, Y. Xi, C.-C. Chueh, D. Zhao, F. Lin, L. D. Pozzo, W. Tang and A. K.-Y. Jen, *Adv. Mater. Interfaces*, 2016, **3**, 1600476.

63. L. Ye, Y. Xiong, H. Yao, A. Gadisa, H. Zhang, S. Li, M. Ghasemi, N. Balar, A. Hunt, B. T. O'Connor, J. Hou and H. Ade, *Chem. Mater.*, 2016, **28**, 7451-7458.
64. K. Liu, T. T. Larsen-Olsen, Y. Lin, M. Beliatas, E. Bundgaard, M. Jørgensen, F. C. Krebs and X. Zhan, *J. Mater. Chem. A*, 2016, **4**, 1044-1051.
65. W. Zhao, D. Qian, S. Zhang, S. Li, O. Inganäs, F. Gao and J. Hou, *Adv. Mater.*, 2016, **28**, 4734-4739.
66. Suman, A. Bagui, R. Datt, V. Gupta and S. P. Singh, *Chem. Commun.*, 2017, **53**, 12790-12793.
67. Q. Wu, D. Zhao, J. Yang, V. Sharapov, Z. Cai, L. Li, N. Zhang, A. Neshchadin, W. Chen and L. Yu, *Chem. Mater.*, 2017, **29**, 1127-1133.
68. H. Cha, J. Wu, A. Wadsworth, J. Nagitta, S. Limbu, S. Pont, Z. Li, J. Searle, M. F. Wyatt, D. Baran, J.-S. Kim, I. McCulloch and J. R. Durrant, *Adv. Mater.*, 2017, **29**, 1701156.
69. Y. Li, L. Zhong, J.-D. Lin, F.-P. Wu, H.-J. Bin, Z. Zhang, L. Xu, Z.-Q. Jiang, Z.-G. Zhang, F. Liu, T. P. Russell, Y. Li, L.-S. Liao and S. R. Forrest, *Sol. RRL*, 2017, **1**, 1700107.
70. S. Chen, H. Yao, Z. Li, O. M. Awartani, Y. Liu, Z. Wang, G. Yang, J. Zhang, H. Ade and H. Yan, *Adv. Energy Mater.*, 2017, **7**, 1602304.
71. L. Ye, Y. Xiong, S. Li, M. Ghasemi, N. Balar, J. Turner, A. Gadisa, J. Hou, B. T. O'Connor and H. Ade, *Adv. Funct. Mater.*, 2017, **27**, 1702016.
72. Y.-Y. Yu, T.-W. Tsai, C.-C. Yang and C.-P. Chen, *J. Phys. Chem. C*, 2017, **121**, 21969-21974.
73. X. Gu, Y. Zhou, K. Gu, T. Kurosawa, Y. Guo, Y. Li, H. Lin, B. C. Schroeder, H. Yan, F. Molina-Lopez, C. J. Tassone, C. Wang, S. C. B. Mannsfeld, H. Yan, D. Zhao, M. F. Toney and Z. Bao, *Adv. Energy Mater.*, 2017, **7**, 1602742.
74. B. He, B. Yang, M. A. Kolaczkowski, C. A. Anderson, L. M. Klivansky, T. L. Chen, M. A. Brady and Y. Liu, *ACS Energy Lett.*, 2018, **3**, 1028-1035.
75. Z. Zhang and X. Zhu, *J. Mater. Chem. A*, 2018, **6**, 4266-4270.
76. Q. Kang, B. Yang, Y. Xu, B. Xu and J. Hou, *Adv. Mater.*, 2018, **30**, 1801718.
77. Y. Lin, Y. Jin, S. Dong, W. Zheng, J. Yang, A. Liu, F. Liu, Y. Jiang, T. P. Russell, F. Zhang, F. Huang and L. Hou, *Adv. Energy Mater.*, 2018, **8**, 1701942.
78. L. Ye, Y. Xiong, Q. Zhang, S. Li, C. Wang, Z. Jiang, J. Hou, W. You and H. Ade, *Adv. Mater.*, 2018, **30**, 1705485.
79. W. Zhao, S. Zhang, Y. Zhang, S. Li, X. Liu, C. He, Z. Zheng and J. Hou, *Adv. Mater.*, 2018, **30**, 1704837.
80. Y. Lin, S. Dong, Z. Li, W. Zheng, J. Yang, A. Liu, W. Cai, F. Liu, Y. Jiang, T. P. Russell, F. Huang, E. Wang and L. Hou, *Nano Energy*, 2018, **46**, 428-435.
81. T. Zhang, G. Zeng, F. Ye, X. Zhao and X. Yang, *Adv. Energy Mater.*, 2018, **8**, 1801387.
82. L. Mao, B. Luo, L. Sun, S. Xiong, J. Fan, F. Qin, L. Hu, Y. Jiang, Z. Li and Y. Zhou, *Mater. Horiz.*, 2018, **5**, 123-130.
83. S. Strohm, F. Machui, S. Langner, P. Kubis, N. Gasparini, M. Salvador, I. McCulloch, H. J. Egelhaaf and C. J. Brabec, *Energy Environ. Sci.*, 2018, **11**, 2225-2234.
84. L. Hong, H. Yao, Z. Wu, Y. Cui, T. Zhang, Y. Xu, R. Yu, Q. Liao, B. Gao, K. Xian, H. Y. Woo, Z. Ge and J. Hou, *Adv. Mater.*, 2019, **31**, 1903441.
85. W. Li, M. Chen, J. Cai, E. L. K. Spooner, H. Zhang, R. S. Gurney, D. Liu, Z. Xiao, D. G. Lidzey, L. Ding and T. Wang, *Joule*, 2019, **3**, 819-833.
86. R. Sun, J. Guo, C. Sun, T. Wang, Z. Luo, Z. Zhang, X. Jiao, W. Tang, C. Yang,

- Y. Li and J. Min, *Energy Environ. Sci.*, 2019, **12**, 384-395.
87. J. Yuan, Y. Zhang, L. Zhou, G. Zhang, H.-L. Yip, T.-K. Lau, X. Lu, C. Zhu, H. Peng, P. A. Johnson, M. Leclerc, Y. Cao, J. Ulanski, Y. Li and Y. Zou, *Joule*, 2019, **3**, 1140-1151.
  88. Y. Xiong, L. Ye, A. Gadisa, Q. Zhang, J. J. Rech, W. You and H. Ade, *Adv. Funct. Mater.*, 2019, **29**, 1806262.
  89. Y. Cui, H. Yao, J. Zhang, T. Zhang, Y. Wang, L. Hong, K. Xian, B. Xu, S. Zhang, J. Peng, Z. Wei, F. Gao and J. Hou, *Nat. Commun.*, 2019, **10**, 2515.
  90. H. Hu, W. Deng, M. Qin, H. Yin, T.-K. Lau, P. W. K. Fong, Z. Ren, Q. Liang, L. Cui, H. Wu, X. Lu, W. Zhang, I. McCulloch and G. Li, *Mater. Today Energy*, 2019, **12**, 398-407.
  91. R. Datt, Suman, A. Bagui, A. Siddiqui, R. Sharma, V. Gupta, S. Yoo, S. Kumar and S. P. Singh, *Sci. Rep.*, 2019, **9**, 8529.
  92. S.-I. Na, Y.-H. Seo, Y.-C. Nah, S.-S. Kim, H. Heo, J.-E. Kim, N. Rolston, R. H. Dauskardt, M. Gao, Y. Lee and D. Vak, *Adv. Funct. Mater.*, 2019, **29**, 1805825.
  93. G. Ji, W. Zhao, J. Wei, L. Yan, Y. Han, Q. Luo, S. Yang, J. Hou and C.-Q. Ma, *J. Mater. Chem. A*, 2019, **7**, 212-220.
  94. Q. Wu, J. Guo, R. Sun, J. Guo, S. Jia, Y. Li, J. Wang and J. Min, *Nano Energy*, 2019, **61**, 559-566.
  95. Q. Kang, L. Ye, B. Xu, C. An, S. J. Stuard, S. Zhang, H. Yao, H. Ade and J. Hou, *Joule*, 2019, **3**, 227-239.
  96. W. Zhao, Y. Zhang, S. Zhang, S. Li, C. He and J. Hou, *J. Mater. Chem. C*, 2019, **7**, 3206-3211.
  97. Y. W. Han, S. J. Jeon, H. S. Lee, H. Park, K. S. Kim, H.-W. Lee and D. K. Moon, *Adv. Energy Mater.*, 2019, **9**, 1902065.
  98. K.-M. Huang, C.-M. Lin, S.-H. Chen, C.-S. Li, C.-H. Hu, Y. Zhang, H.-F. Meng, C.-Y. Chang, Y.-C. Chao, H.-W. Zan, L. Huo and P. Yu, *Sol. RRL*, 2019, **3**, 1900071.
  99. X. Ke, L. Meng, X. Wan, M. Li, Y. Sun, Z. Guo, S. Wu, H. Zhang, C. Li and Y. Chen, *J. Mater. Chem. A*, 2020, **8**, 9726-9732.
  100. K. Weng, L. Ye, L. Zhu, J. Xu, J. Zhou, X. Feng, G. Lu, S. Tan, F. Liu and Y. Sun, *Nat. Commun.*, 2020, **11**, 2855.
  101. Z. Zhang, Y. Li, G. Cai, Y. Zhang, X. Lu and Y. Lin, *J. Am. Chem. Soc.*, 2020, **142**, 18741-18745.
  102. Q. Liu, Y. Jiang, K. Jin, J. Qin, J. Xu, W. Li, J. Xiong, J. Liu, Z. Xiao, K. Sun, S. Yang, X. Zhang and L. Ding, *Sci. Bull.*, 2020, **65**, 272-275.
  103. C.-Y. Liao, Y. Chen, C.-C. Lee, G. Wang, N.-W. Teng, C.-H. Lee, W.-L. Li, Y.-K. Chen, C.-H. Li, H.-L. Ho, P. H.-S. Tan, B. Wang, Y.-C. Huang, R. M. Young, M. R. Wasielewski, T. J. Marks, Y.-M. Chang and A. Facchetti, *Joule*, 2020, **4**, 189-206.
  104. C.-Y. Tsai, Y.-H. Lin, Y.-M. Chang, J.-C. Kao, Y.-C. Liang, C.-C. Liu, J. Qiu, L. Wu, C.-Y. Liao, H.-S. Tan, Y.-C. Chao, S.-F. Horng, H.-W. Zan, H.-F. Meng and F. Li, *Sol. Energy Mater. Sol. Cells*, 2020, **218**, 110762.
  105. R. Sun, Q. Wu, J. Guo, T. Wang, Y. Wu, B. Qiu, Z. Luo, W. Yang, Z. Hu, J. Guo, M. Shi, C. Yang, F. Huang, Y. Li and J. Min, *Joule*, 2020, **4**, 407-419.
  106. Y. Cui, H. Yao, L. Hong, T. Zhang, Y. Tang, B. Lin, K. Xian, B. Gao, C. An, P. Bi, W. Ma and J. Hou, *Natl. Sci. Rev.*, 2020, **7**, 1239-1246.
  107. Y. Cui, H. Yao, J. Zhang, K. Xian, T. Zhang, L. Hong, Y. Wang, Y. Xu, K. Ma, C. An, C. He, Z. Wei, F. Gao and J. Hou, *Adv. Mater.*, 2020, **32**, 1908205.

108. S. Dong, T. Jia, K. Zhang, J. Jing and F. Huang, *Joule*, 2020, **4**, 2004-2016.
109. T. Lee, S. Oh, S. Rasool, C. E. Song, D. Kim, S. K. Lee, W. S. Shin and E. Lim, *J. Mater. Chem. A*, 2020, **8**, 10318-10330.
110. P. Li, J. Fang, Y. Wang, S. Manzhos, L. Cai, Z. Song, Y. Li, T. Song, X. Wang, X. Guo, M. Zhang, D. Ma and B. Sun, *Angew. Chem. Int. Ed.*, 2021, **60**, 15054-15062.
111. C. Li, J. Zhou, J. Song, J. Xu, H. Zhang, X. Zhang, J. Guo, L. Zhu, D. Wei, G. Han, J. Min, Y. Zhang, Z. Xie, Y. Yi, H. Yan, F. Gao, F. Liu and Y. Sun, *Nat. Energy*, 2021, **6**, 605-613.
112. M. Zhang, L. Zhu, T. Hao, G. Zhou, C. Qiu, Z. Zhao, N. Hartmann, B. Xiao, Y. Zou, W. Feng, H. Zhu, M. Zhang, Y. Zhang, Y. Li, T. P. Russell and F. Liu, *Adv. Mater.*, 2021, **33**, 2007177.
113. J. Yuan, D. Liu, H. Zhao, B. Lin, X. Zhou, H. B. Naveed, C. Zhao, K. Zhou, Z. Tang, F. Chen and W. Ma, *Adv. Energy Mater.*, 2021, **11**, 2100098.
114. S. H. Park, S. Park, K. J. Lee, J. K. Kim and H. J. Son, *Dyes. Pigm.*, 2021, **194**, 109523.
115. Q. Wu, W. Wang, Y. Wu, Z. Chen, J. Guo, R. Sun, J. Guo, Y. Yang and J. Min, *Adv. Funct. Mater.*, 2021, **31**, 2010411.
116. G. Li, X. Zhang, L. O. Jones, J. M. Alzola, S. Mukherjee, L.-w. Feng, W. Zhu, C. L. Stern, W. Huang, J. Yu, V. K. Sangwan, D. M. DeLongchamp, K. L. Kohlstedt, M. R. Wasielewski, M. C. Hersam, G. C. Schatz, A. Facchetti and T. J. Marks, *J. Am. Chem. Soc.*, 2021, **143**, 6123-6139.
117. Y. Li, H. Liu, J. Wu, H. Tang, H. Wang, Q. Yang, Y. Fu and Z. Xie, *ACS Appl. Mater. Interfaces*, 2021, **13**, 10239-10248.
118. A. Prasetio, M. Jahandar, S. Kim, J. Heo, Y. H. Kim and D. C. Lim, *Adv. Sci.*, 2021, **8**, 2100865.
119. J. Hofinger, C. Putz, F. Mayr, K. Gugujonovic, D. Wielend and M. C. Scharber, *Mater. Adv.*, 2021, **2**, 4291-4302.
